# Supplementary material
Source: Elsevier journal article supplement (https://rcastoragev2.blob.core.windows.net/7207246b7f3f822727c1014654d7ed08/mmc1.pdf)
Supplement: mmc1 [file mmc1.pdf]

**Cell, Volume 184**

**Supplemental information**

**Impaired neural replay of inferred  
relationships in schizophrenia**

**Matthew M. Nour, Yunzhe Liu, Atheeshaan Arumham, Zeb Kurth-Nelson, and Raymond  
J. Dolan**

| Variable                                                   | Healthy volunteers | Patients        | Group comparison <sup>#</sup>         |
|------------------------------------------------------------|--------------------|-----------------|---------------------------------------|
| <b>Demographic</b>                                         |                    |                 |                                       |
| Sample size                                                | 27                 | 28              |                                       |
| Gender                                                     | 6 F, 21 M          | 6 F, 22 M       | $\chi^2 = 0.005$ (P = 0.94)           |
| Age (mean, SD)                                             | 27.3 (5.94)        | 28.2 (5.26)     | t = -0.61 (P = 0.54)                  |
| Years in education (mean, SD)                              | 18.2 (3.5)         | 17.0 (3.2)      | t = 1.31 (P = 0.20)                   |
| Employment status [F/P/U]*                                 | 7 / 6 / 14         | 10 / 3 / 15     | $\chi^2 = 1.55$ (P = 0.46)            |
| Handedness                                                 | 23R, 4L            | 26R, 2L         | $\chi^2 = 0.83$ (P = 0.36)            |
| Ethnicity [W / BAME / Other] <sup>†</sup>                  | 10 / 12 / 5        | 10 / 15 / 3     | $\chi^2 = 0.82$ (P = 0.67)            |
| Alcohol units week <sup>-1</sup> (mean, SD)                | 3.63 (5.58)        | 3.18 (6.00)     | t = 0.29 (P = 0.77)                   |
| Current recreational cannabis (not within 1 week)          | 8                  | 11              | $\chi^2 = 0.57$ (P = 0.45)            |
| Current smoker (not within 6 hours)                        | 5                  | 13              | $\chi^2 = 4.86$ (P = 0.03)            |
| <b>Cognitive</b>                                           |                    |                 |                                       |
| IQ (SD)                                                    | 103.9 (5.6)        | 103.9 (8.43)    | t = -0.002 (P = 1.00)                 |
| Digit span forward (mean, SD)                              | 6.35 (0.95)        | 6.16 (1.18)     | t = 0.66 (P = 0.52)                   |
| Digit span backward (mean, SD)                             | 4.15 (0.99)        | 3.73 (1.16)     | t = 1.43 (P = 0.16)                   |
| <b>Psychiatric symptoms and signs</b>                      |                    |                 |                                       |
| Depressive symptoms <sup>‡</sup> (mean, SD)                | 0.89 (2.53)        | 8.71 (5.58)     | t = -6.66 (P = 1.6*10 <sup>-8</sup> ) |
| Positive psychotic symptoms <sup>§</sup> (mean, SD)        | 7.11 (0.32)        | 14.4 (6.21)     | t = -6.08 (P = 1.3*10 <sup>-7</sup> ) |
| Negative psychotic symptoms <sup>§</sup> (mean, SD)        | 7.07 (0.27)        | 14.4 (6.56)     | t = -5.79 (P = 3.8*10 <sup>-7</sup> ) |
| General psychopathology <sup>§</sup> (mean, SD)            | 16.4 (1.01)        | 25.4 (7.08)     | t = -6.51 (P = 2.8*10 <sup>-8</sup> ) |
| General assessment of functioning <sup>  </sup> (mean, SD) | 98.3 (5.2)         | 69.4 (14.2)     | t = 9.95 (P = 1.0*10 <sup>-13</sup> ) |
| <b>Clinical Details</b>                                    |                    |                 |                                       |
| Number taking D2/3R antagonist medication                  | -                  | 15 <sup>¶</sup> | -                                     |
| Months since first psychotic episode (median, IQR)         | -                  | 48 (30)         | -                                     |
| Number acute psychotic episodes (median, IQR)              | -                  | 3 (2)           | -                                     |
| Number inpatient admissions (median, IQR)                  | -                  | 1 (3)           | -                                     |

**Table S1. Participant demographic, cognitive and clinical information. Related to STAR\*Methods.**

\* F = fulltime employment, P = part-time employment, U = unemployed (including student).

<sup>†</sup> W = White. BAME = Black, Asian, and Minority Ethnic. Other includes multiple ethnic groups.

<sup>‡</sup> Montgomery Åsberg Depression Rating Scale (MADRS), floor = 0.

<sup>§</sup> Positive and Negative Syndrome Scale (PANSS) scale, floor = 7(positive), 7(negative), 16(general).

<sup>||</sup> General Assessment of Functioning (GAF) scored from 0 – 100.

<sup>¶</sup> D2/3 antagonist medication per medicated patient: (1) olanzapine 15 mg day<sup>-1</sup>, (2) olanzapine 10 mg day<sup>-1</sup>, (3) lurasidone 18.5 mg day<sup>-1</sup>, (4) aripiprazole 10mg day<sup>-1</sup>, (5) lurasidone 37 mg day<sup>-1</sup>, (6) risperidone 3 mg day<sup>-1</sup>, (7) aripiprazole 400mg month<sup>-1</sup> (depot), (8) risperidone 0.5 mg day<sup>-1</sup>, (9) aripiprazole 5 mg day<sup>-1</sup>, (10) olanzapine 7.5 mg day<sup>-1</sup>, (11) olanzapine 10 mg day<sup>-1</sup>, (12) amisulpride 400 mg day<sup>-1</sup> & aripiprazole 5 mg day<sup>-1</sup>, (13) paliperidone 50 mg month<sup>-1</sup> (depot), (14) paliperidone 175 mg 3-month<sup>-1</sup> (depot), (15) paliperidone 50 mg month<sup>-1</sup> (depot).

<sup>#</sup>Group comparisons: unpaired t-test for continuous variables (two-tailed), Chi squared test for categorical variables (two-tailed).

SD: standard deviation. IQR: inter-quartile range.

| Regression model (predictor variables)                                                   | beta                  | S.E   | T stat (df) | P value |
|------------------------------------------------------------------------------------------|-----------------------|-------|-------------|---------|
| <b>Position representation</b>                                                           |                       |       |             |         |
| <i>a. Position ~ group + peak ripple power (PRE) + interaction</i>                       |                       |       |             |         |
| Group*                                                                                   | 0.017                 | 0.012 | 1.45, (49)  | 0.16    |
| Peak ripple power <sup>†</sup> (PRE <sup>§</sup> )                                       | 0.008                 | 0.009 | 0.92 (49)   | 0.36    |
| Interaction                                                                              | -0.022                | 0.018 | -1.24 (49)  | 0.22    |
| <i>b. Position ~ group + sequenceness (POST) + interaction</i>                           |                       |       |             |         |
| Group                                                                                    | 0.017                 | 0.013 | 1.30 (50)   | 0.20    |
| Sequenceness <sup>‡</sup> (POST <sup>§</sup> )                                           | 0.001                 | 0.003 | 0.38 (50)   | 0.71    |
| Interaction                                                                              | -0.0003               | 0.006 | -0.051 (50) | 0.96    |
| <b>Within-sequence confusion representation</b>                                          |                       |       |             |         |
| <i>a. Within-sequence confusion ~ group + sequence learning efficiency + interaction</i> |                       |       |             |         |
| Group                                                                                    | -0.016                | 0.009 | -1.64 (51)  | 0.11    |
| Sequence learning efficiency                                                             | -0.038                | 0.037 | -1.03 (51)  | 0.31    |
| Interaction                                                                              | 0.020                 | 0.073 | 0.26 (51)   | 0.79    |
| <i>b. Within-sequence confusion ~ group + peak ripple power (POST) + interaction</i>     |                       |       |             |         |
| Group                                                                                    | -0.022                | 0.009 | -2.32 (49)  | 0.03    |
| Peak ripple power (POST)                                                                 | -0.005                | 0.007 | -0.69 (49)  | 0.49    |
| Interaction                                                                              | -0.015                | 0.013 | -1.11 (49)  | 0.27    |
| <i>c. Within-sequence confusion ~ group + sequenceness (POST) + interaction</i>          |                       |       |             |         |
| Group                                                                                    | -0.019                | 0.011 | -1.87 (50)  | 0.07    |
| Sequenceness (POST)                                                                      | 0.0005                | 0.002 | 0.20 (50)   | 0.84    |
| Interaction                                                                              | -0.002                | 0.005 | -0.35 (50)  | 0.73    |
| <b>Across-sequence confusion representation</b>                                          |                       |       |             |         |
| <i>a. Across-sequence confusion ~ group + sequence learning efficiency + interaction</i> |                       |       |             |         |
| Group                                                                                    | 0.005                 | 0.008 | 0.66 (51)   | 0.51    |
| Sequence learning efficiency                                                             | 0.003                 | 0.032 | 0.79 (51)   | 0.94    |
| Interaction                                                                              | 0.077                 | 0.063 | 1.22 (51)   | 0.22    |
| <i>b. Across-sequence confusion ~ group + peak ripple power (POST) + interaction</i>     |                       |       |             |         |
| Group                                                                                    | 5.56*10 <sup>-5</sup> | 0.008 | 0.007 (49)  | 0.99    |
| Peak ripple power (POST)                                                                 | -0.005                | 0.006 | -0.83 (49)  | 0.41    |
| Interaction                                                                              | 0.002                 | 0.012 | 0.18 (49)   | 0.86    |
| <i>c. Across-sequence confusion ~ group + sequenceness (POST) + interaction</i>          |                       |       |             |         |
| Group                                                                                    | 0.002                 | 0.008 | 0.22 (50)   | 0.83    |
| Sequenceness (POST)                                                                      | -0.002                | 0.002 | -1.10 (50)  | 0.28    |
| Interaction                                                                              | 0.004                 | 0.004 | 0.89 (50)   | 0.38    |

**Table S2. Control analyses for prediction of structural representation post-learning. Related to Figures 7 and S5.**

\*Group is effects coded (patients = -0.5, controls = +0.5).

<sup>†</sup>Peak ripple power is the peak power increase in the ripple band, within the presumptive replay epoch (0 – 50 ms ± 10 ms), mean centered.

<sup>§</sup>PRE & POST refer to pre- and post-learning rest sessions.

<sup>‡</sup>Sequenceness is the mean effect at 40 – 50 ms (peak in the combined sample).

Regression models grouped by dependent variable (representation effect at predictor-specific peak time point, derived from combined sample, see **Figures 7 & S5**). Three predictor variables per model: two main effects and their interaction.

S.E. = standard error of beta estimate.

df = degrees of freedom associated with t-statistic on the coefficient.

5

| Clinical variable                    | Correlation* with<br>Sequence Learning Efficiency | Correlation with Sequenceness<br>(POST learning, 40-50 ms lag) |
|--------------------------------------|---------------------------------------------------|----------------------------------------------------------------|
| <b>Symptom scores</b>                |                                                   |                                                                |
| Positive psychotic symptoms (PANSS†) | $\rho(26) = -0.21, P = 0.27$                      | $\rho(25) = 0.11, P = 0.60$                                    |
| Negative psychotic symptoms (PANSS)  | $\rho(26) = 0.05, P = 0.79$                       | $\rho(25) = -0.04, P = 0.83$                                   |
| General psychopathology (PANSS)      | $\rho(26) = -0.23, P = 0.24$                      | $\rho(25) = -0.17, P = 0.40$                                   |
| Depressive symptoms (MADRS‡)         | $\rho(26) = -0.12, P = 0.54$                      | $\rho(25) = -0.19, P = 0.33$                                   |
| <b>Illness chronicity</b>            |                                                   |                                                                |
| Months since first psychotic episode | $\rho(26) = 0.16, P = 0.41$                       | $\rho(25) = 0.23, P = 0.24$                                    |
| Age at symptom onset                 | $\rho(26) = 0.11, P = 0.57$                       | $\rho(25) = 0.14, P = 0.50$                                    |
| Age at MEG                           | $\rho(26) = 0.05, P = 0.81$                       | $\rho(25) = 0.15, P = 0.47$                                    |

**Table S3. Correlation between clinical variables and primary behavioral and neural measures in patients. Related to Figures 2 & 4.**

\* Spearman's rank correlation coefficient.

† Positive and Negative Syndrome Scale (PANSS) scale.

‡ Montgomery Åsberg Depression Rating Scale (MADRS).
